# Supplementary material for: A comparison of rumen microbial profiles in dairy cows as retrieved by 454 Roche and Ion Torrent (PGM) sequencing platforms
Source: PeerJ journal article supplement (doi:10.7717/peerj.1599), 2016-02-04

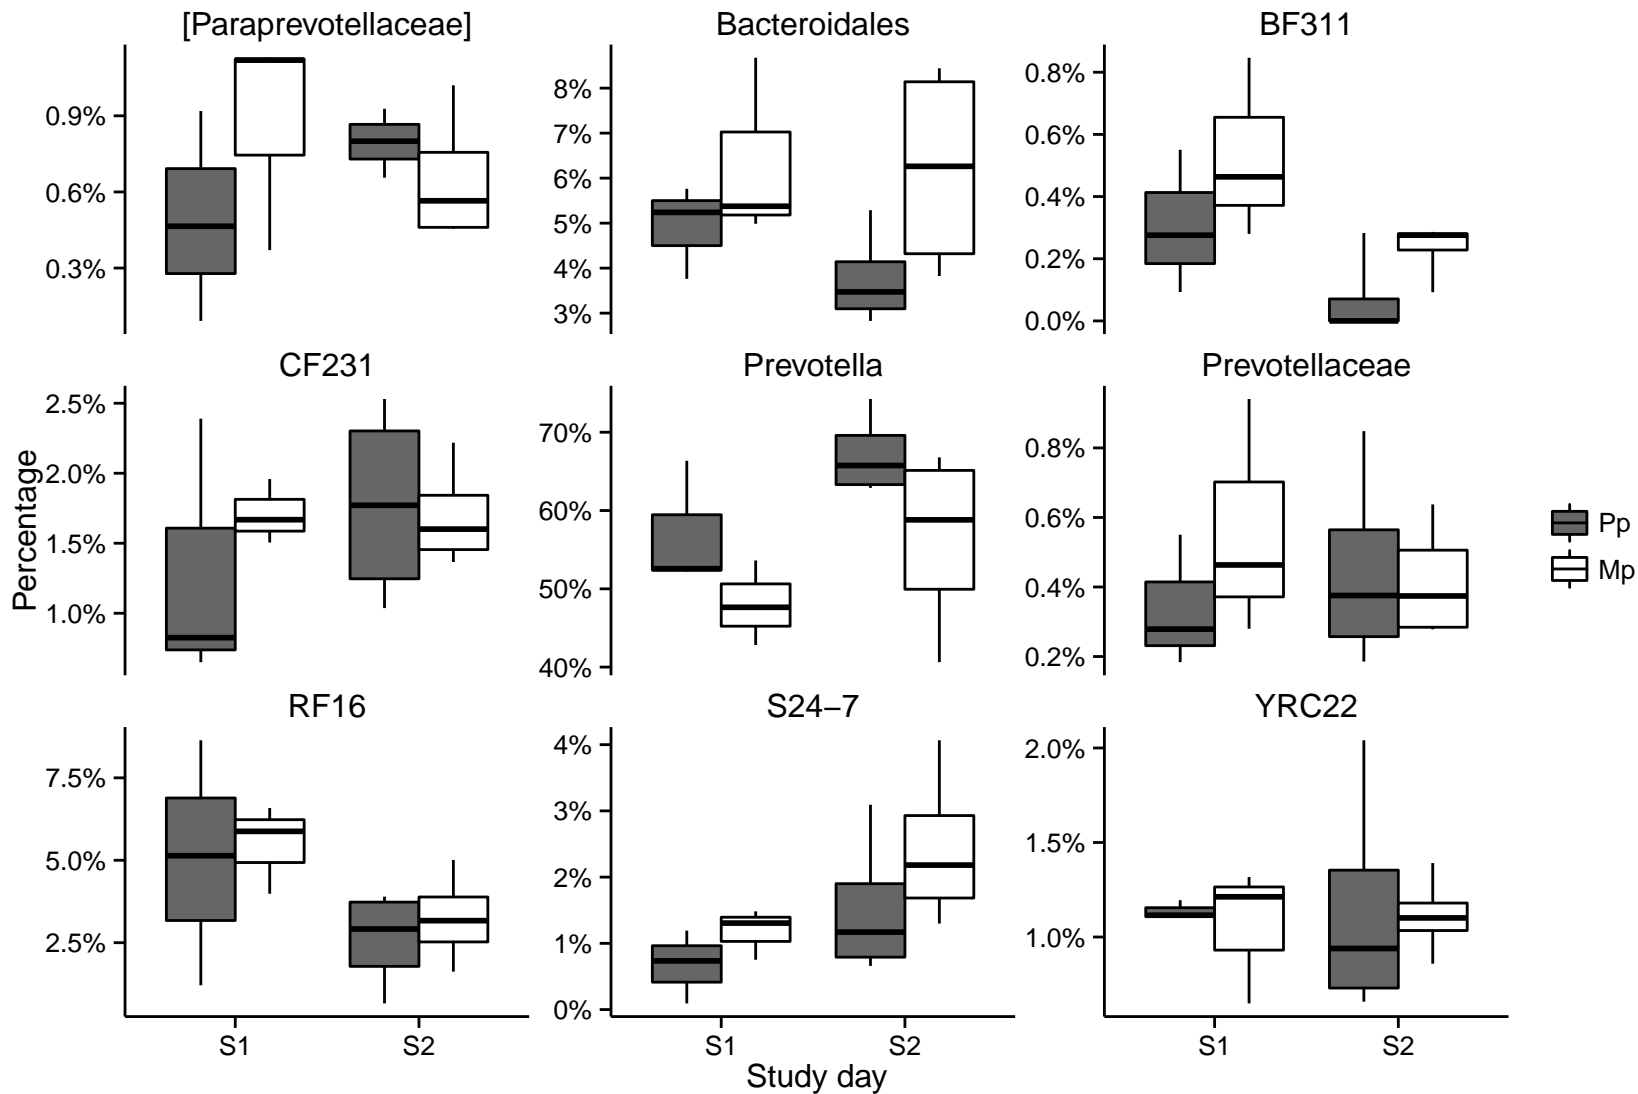

Supplement: Supplementary_Figure_S2.pdf [file Supplementary_Figure_S2.pdf]
