# Supplementary material for: A comparison of rumen microbial profiles in dairy cows as retrieved by 454 Roche and Ion Torrent (PGM) sequencing platforms
Source: PeerJ. 2016 Feb 4;4:e1599. doi: 10.7717/peerj.1599 (PMC4748696; doi:10.7717/peerj.1599)
Supplement: Table S1 [file peerj-04-1599-s001.xlsx]

## Sheet: Sheet1
Sample	AnimalID	Study group	Study day	raw reads		reads after quality filtering
				Roche 454	Ion Torrent	Roche 454	Ion Torrent
Heifer1.S2	454	Heifer	S2	2004	23628	1874	17104
Heifer2.S1	455	Heifer	S1	1505	15512	1301	11507
Heifer2.S2	456	Heifer	S2	3430	12530	3036	9092
Heifer4.S1	457	Heifer	S1	2852	14086	2604	10427
Heifer4.S2	458	Heifer	S2	2271	23326	2131	17204
Heifer5.S1	459	Heifer	S1	3076	38762	2695	27336
Heifer5.S2	460	Heifer	S2	1549	23961	1274	18495
Maturecow1.S1	461	Maturecow	S1	9268	21118	2675	15383
Maturecow1.S2	462	Maturecow	S2	2201	12948	1873	9140
Maturecow2.S1	463	Maturecow	S1	1334	8396	1212	5653
Maturecow2.S2	464	Maturecow	S2	3057	24660	2280	17454
Maturecow3.S2	465	Maturecow	S2	2397	25754	2225	19211
Maturecow4.S1	466	Maturecow	S1	2209	13937	1789	9434
Maturecow4.S2	467	Maturecow	S2	2439	21666	2088	16470
			Sum	39592	280284	29057	203910
			min	1334	8396	1212	5653
			max	9268	38762	3036	27336
			mean	2828	20020.3	2075.5	14565
% of raw reads recovered						73.39	72.75
