# Supplementary material for: A comparison of rumen microbial profiles in dairy cows as retrieved by 454 Roche and Ion Torrent (PGM) sequencing platforms
Source: PeerJ. 2016 Feb 4;4:e1599. doi: 10.7717/peerj.1599 (PMC4748696; doi:10.7717/peerj.1599)
Supplement: Table S2 [file peerj-04-1599-s002.xlsx]

## Sheet: Roche_454_phyla_prop_table
	Maturecow1.S2	Heifer4.S2	Maturecow3.S2	Heifer5.S1	Heifer2.S2	Maturecow4.S2	Heifer5.S2	Heifer4.S1	Heifer1.S2	Maturecow1.S1	Maturecow4.S1	Maturecow2.S1	Maturecow2.S2	Heifer2.S1
Actinobacteria	0	0	0	0	0	0	0	0	0	0.000914077	0	0	0	0
Bacteroidetes	0.68359	0.91068	0.869526	0.826679	0.889393	0.83475	0.926716	0.76077	0.852995	0.786106	0.751115	0.710339	0.756144	0.747788
Cyanobacteria	0.00634633	0	0.000893655	0.00635209	0	0.00283286	0	0.015582	0.00181488	0.00274223	0.0044603	0.00178253	0.00094518	0.00265487
Elusimicrobia	0.00181324	0	0	0.00181488	0	0	0.000927644	0	0.000907441	0	0	0.0026738	0	0
Fibrobacteres	0.019039	0.00679612	0.00357462	0.0163339	0	0.0273843	0.00463822	0.0247479	0.000907441	0.000914077	0.0133809	0.00891266	0.0293006	0.0212389
Firmicutes	0.152312	0.0466019	0.0500447	0.0680581	0.0543971	0.0462701	0.0380334	0.110907	0.0907441	0.117916	0.12132	0.149733	0.103025	0.153097
Lentisphaerae	0	0	0	0	0	0	0	0	0	0.000914077	0	0	0	0
Proteobacteria	0.0235721	0.00194175	0.023235	0.0172414	0.00815956	0.0188857	0.00278293	0.0119157	0.00998185	0.0109689	0.0107047	0.0320856	0.0236295	0.00707965
Spirochaetes	0.00815956	0	0.000893655	0.000907441	0.000906618	0.00188857	0	0.00274977	0.000907441	0.00274223	0.00356824	0.00891266	0.00378072	0.000884956
SR1	0.00181324	0	0	0.000907441	0	0.000944287	0	0.00458295	0	0.000914077	0	0.0026738	0.00189036	0.000884956
Synergistetes	0.00271985	0	0.000893655	0.000907441	0	0.000944287	0	0.00091659	0	0	0	0	0	0
Tenericutes	0.00815956	0.00194175	0.00446828	0.000907441	0.00815956	0.00283286	0.00278293	0.00824931	0.00453721	0.0164534	0.0223015	0.0160428	0.00661626	0.00619469
TM7	0.00815956	0	0.00268097	0.00362976	0.00181324	0.00566572	0.00185529	0.00549954	0.00272232	0.00822669	0.00178412	0.00534759	0.00567108	0.00619469
WPS-2	0	0	0	0	0	0	0	0	0	0	0.000892061	0.000891266	0	0
Unassigned	0.0843155	0.0320388	0.0437891	0.0562613	0.0371714	0.0576015	0.0222635	0.0540788	0.0344828	0.0511883	0.0704728	0.0606061	0.0689981	0.0539823

## Sheet: Ion_Torrent_phyla_prop_table
	Maturecow3.S2	Maturecow4.S1	Heifer5.S2	Maturecow4.S2	Heifer1.S2	Maturecow1.S1	Heifer4.S2	Maturecow1.S2	Maturecow2.S2	Heifer2.S2	Heifer5.S1	Maturecow2.S1	Heifer4.S1	Heifer2.S1
Acidobacteria	0	0	0	0.000910747	0	0	0	0	0	0	0	0	0	0
Actinobacteria	0	0.00185357	0	0	0.000937207	0.000940734	0	0.000927644	0.00184843	0.000942507	0	0	0.00185874	0.00183486
Bacteroidetes	0.78626	0.626506	0.783859	0.778689	0.767573	0.725306	0.838346	0.61039	0.731978	0.790763	0.722426	0.663246	0.765799	0.66055
Cyanobacteria	0.000954198	0.00741427	0.00927644	0.00455373	0	0.0056444	0.0018797	0.0102041	0.00277264	0.00754006	0.0220588	0.00373134	0.00185874	0.00550459
Elusimicrobia	0	0	0.000927644	0	0	0	0	0	0	0	0.00275735	0	0	0
Fibrobacteres	0.0019084	0.012975	0.00834879	0.0191257	0.00374883	0.0028222	0.0112782	0.0269017	0.0138632	0.000942507	0.0174632	0.00279851	0	0.0155963
Firmicutes	0.110687	0.188137	0.0992579	0.0892532	0.134021	0.125118	0.0798872	0.191095	0.117375	0.0923657	0.102022	0.172575	0.13197	0.175229
GN02	0	0	0	0	0	0	0	0	0	0	0	0	0	0.00183486
Lentisphaerae	0	0.000926784	0	0	0	0	0	0	0	0	0	0	0	0
Proteobacteria	0.00381679	0.0157553	0.0102041	0.0145719	0.00843486	0.0103481	0.00469925	0.0148423	0.00277264	0.0122526	0.0101103	0.00559701	0.00464684	0.0165138
Spirochaetes	0.00381679	0.0120482	0	0.00546448	0.00749766	0.0112888	0.00093985	0.0120594	0.00277264	0.00282752	0.00643382	0.00373134	0.00185874	0.00458716
SR1	0.000954198	0.000926784	0	0.000910747	0	0	0	0.00278293	0.000924214	0.000942507	0.000919118	0.00466418	0	0.000917431
Synergistetes	0.0019084	0	0	0.000910747	0	0.000940734	0	0.000927644	0	0.000942507	0	0	0	0.000917431
Tenericutes	0.00381679	0.0166821	0.00463822	0.00637523	0.00656045	0.0169332	0.0056391	0.0111317	0.012939	0.00942507	0.0110294	0.00839552	0.00836431	0.0201835
TM7	0.00381679	0.0111214	0.00278293	0.00455373	0.000937207	0.0112888	0	0.0148423	0.00831793	0.00659755	0.0101103	0.00839552	0.00464684	0.0100917
Verrucomicrobia	0	0	0	0	0	0	0	0	0	0	0.000919118	0.000932836	0	0.000917431
WPS-2	0	0.000926784	0	0	0	0.000940734	0	0	0.000924214	0	0	0	0	0.000917431
Unassigned	0.0820611	0.104727	0.080705	0.0746812	0.0702905	0.088429	0.0573308	0.103896	0.103512	0.0744581	0.09375	0.125933	0.0789963	0.0844037

## Sheet: Roche_454_Genus_prop_table
	Maturecow1.S2	Heifer4.S2	Maturecow3.S2	Heifer5.S1	Heifer2.S2	Maturecow4.S2	Heifer5.S2	Heifer4.S1	Heifer1.S2	Maturecow1.S1	Maturecow4.S1	Maturecow2.S1	Maturecow2.S2	Heifer2.S1
Bacteroidetes [Paraprevotellaceae]	0.00362647	0.0038835	0.00357462	0.000907441	0.00725295	0.0075543	0.00556586	0.00366636	0.00453721	0.00548446	0.0044603	0.00891266	0.0198488	0.00176991
Bacteroidetes Bacteroidales	0.121487	0.0330097	0.049151	0.0435572	0.0281052	0.0500472	0.0371058	0.0687443	0.0408348	0.0566728	0.0526316	0.106952	0.0689981	0.0460177
Bacteroidetes CF231	0.0208522	0.0106796	0.0160858	0.0172414	0.0099728	0.0113314	0.00927644	0.0109991	0.0199637	0.023766	0.0124888	0.0151515	0.0255198	0.0106195
Bacteroidetes Prevotella	0.435177	0.826214	0.736372	0.638838	0.805984	0.661001	0.825603	0.623281	0.720508	0.606033	0.603925	0.423351	0.512287	0.59646
Bacteroidetes Prevotellaceae	0.0099728	0.00194175	0.0116175	0.00272232	0.00906618	0.00849858	0.00185529	0.00458295	0.00272232	0.00365631	0.000892061	0.00178253	0.00756144	0.00176991
Bacteroidetes RF16	0.0553037	0.0038835	0.0142985	0.0970962	0.0135993	0.0179415	0.028757	0.0274977	0.0136116	0.0676417	0.0347904	0.0775401	0.0349716	0.0637168
Bacteroidetes S24-7	0.0235721	0.0262136	0.028597	0.0127042	0.00634633	0.068933	0.00556586	0.00274977	0.0417423	0.00548446	0.0160571	0.0338681	0.073724	0.0106195
Bacteroidetes YRC22	0.00543971	0.0038835	0.00625559	0.0108893	0.00815956	0.00944287	0.012987	0.015582	0.00816697	0.0100548	0.0133809	0.0124777	0.0122873	0.0132743
Cyanobacteria YS2	0.00634633	0	0.000893655	0.00635209	0	0.00283286	0	0.015582	0.00181488	0.00274223	0.0044603	0.00178253	0.00094518	0.00265487
Fibrobacteres Fibrobacter	0.019039	0.00679612	0.00357462	0.0163339	0	0.0273843	0.00463822	0.0247479	0.000907441	0.000914077	0.0133809	0.00891266	0.0293006	0.0212389
Firmicutes Butyrivibrio	0.00271985	0.0038835	0.00357462	0.000907441	0.00362647	0	0.000927644	0.00274977	0.00635209	0.00365631	0.00267618	0.00178253	0.00094518	0.00619469
Firmicutes Clostridiales	0.0553037	0.00485437	0.00983021	0.022686	0.0108794	0.00944287	0.0102041	0.0339138	0.0172414	0.0265082	0.0285459	0.0463458	0.026465	0.0663717
Firmicutes Coprococcus	0.00181324	0.000970874	0.000893655	0.00362976	0.00181324	0.00472144	0.00185529	0.00458295	0.000907441	0.00182815	0.00356824	0.000891266	0.00189036	0.00265487
Firmicutes Lachnospiraceae	0.0181324	0.0145631	0.00446828	0.0127042	0.0099728	0.0122757	0.00556586	0.0109991	0.0154265	0.0146252	0.0115968	0.0196078	0.0141777	0.0212389
Firmicutes RFN20	0.0208522	0.000970874	0.00893655	0.00453721	0.00362647	0.000944287	0.000927644	0.00824931	0.00181488	0.0319927	0.014273	0.0151515	0.0094518	0.00619469
Firmicutes Ruminococcaceae	0.0154125	0.000970874	0.0080429	0.00816697	0.00271985	0.00283286	0.00278293	0.00733272	0.00907441	0.00822669	0.0160571	0.0294118	0.00378072	0.0132743
Firmicutes Ruminococcus	0.00725295	0.00291262	0.00268097	0.00453721	0	0.00377715	0.00278293	0.00458295	0.00907441	0.00548446	0.00981267	0.0124777	0.0132325	0.00707965
Firmicutes Succiniclasticum	0.00362647	0.00194175	0.00714924	0.00544465	0.0099728	0.00472144	0.00556586	0.0284143	0.00907441	0.00914077	0.0160571	0.000891266	0.0047259	0.0185841
Firmicutes Veillonellaceae	0.00362647	0.00291262	0	0	0.000906618	0.00283286	0.00185529	0.00183318	0.00635209	0.00274223	0.000892061	0	0.00283554	0.000884956
Proteobacteria RF32	0.00271985	0.00194175	0.00268097	0.000907441	0.00181324	0.000944287	0	0.00091659	0.00181488	0	0.00178412	0.00178253	0.00189036	0.00353982
Proteobacteria Succinivibrionaceae	0.0099728	0	0.0178731	0.00453721	0.00543971	0.0179415	0.00185529	0.00183318	0.00544465	0.0100548	0.0044603	0.0187166	0.0198488	0
Spirochaetes Treponema	0.00725295	0	0	0.000907441	0.000906618	0.00188857	0	0.00183318	0.000907441	0.00274223	0.00356824	0.00802139	0.00378072	0.000884956
Tenericutes Anaeroplasma	0.00725295	0.00194175	0.00446828	0.000907441	0.00725295	0.00283286	0.00278293	0.00824931	0.00362976	0.0155393	0.0214095	0.0115865	0.00661626	0.00530973
TM7 F16	0.00815956	0	0.00268097	0.00362976	0.00181324	0.00566572	0.00185529	0.00549954	0.00272232	0.00822669	0.00178412	0.00534759	0.00567108	0.00619469
Unassigned	0.0843155	0.0320388	0.0437891	0.0562613	0.0371714	0.0576015	0.0222635	0.0540788	0.0344828	0.0511883	0.0704728	0.0606061	0.0689981	0.0539823

## Sheet: Ion_Torrent_Genus_prop_table
	Maturecow3.S2	Maturecow4.S1	Heifer5.S2	Maturecow4.S2	Heifer1.S2	Maturecow1.S1	Heifer4.S2	Maturecow1.S2	Maturecow2.S2	Heifer2.S2	Heifer5.S1	Maturecow2.S1	Heifer4.S1	Heifer2.S1
Bacteroidetes [Paraprevotellaceae]	0.00667939	0.00370714	0.00927644	0.00455373	0.00656045	0.0112888	0.00845865	0.0102041	0.00462107	0.00754006	0.00919118	0.011194	0.00464684	0.000917431
Bacteroidetes Bacteroidales	0.0448473	0.0537535	0.0528757	0.0382514	0.031865	0.0498589	0.037594	0.0844156	0.0804067	0.0282752	0.0523897	0.0867537	0.0576208	0.0376147
Bacteroidetes BF311	0.0028626	0.00463392	0	0.00273224	0	0.0084666	0	0.00278293	0.000924214	0.00282752	0.00275735	0.00279851	0.000929368	0.00550459
Bacteroidetes CF231	0.0171756	0.0166821	0.0222635	0.0136612	0.0253046	0.0150517	0.0131579	0.0148423	0.0221811	0.0103676	0.0238971	0.0195896	0.00650558	0.00825688
Bacteroidetes Prevotella	0.667939	0.476367	0.628942	0.645719	0.634489	0.536218	0.742481	0.406308	0.530499	0.68049	0.522059	0.428172	0.663569	0.525688
Bacteroidetes Prevotellaceae	0.0028626	0.00463392	0.00185529	0.00637523	0.00281162	0.00940734	0.00469925	0.00278293	0.00462107	0.00848256	0.00183824	0.00279851	0.0027881	0.00550459
Bacteroidetes RF16	0.0162214	0.0398517	0.038961	0.0282332	0.0215558	0.0658514	0.00657895	0.0500928	0.0351201	0.0367578	0.0863971	0.0587687	0.0120818	0.0513761
Bacteroidetes S24-7	0.0181298	0.0148285	0.00834879	0.0255009	0.0309278	0.00752587	0.0150376	0.012987	0.0406654	0.00659755	0.00735294	0.0130597	0.000929368	0.0119266
Bacteroidetes YRC22	0.00858779	0.00648749	0.0204082	0.010929	0.0112465	0.0131703	0.00657895	0.0139147	0.0110906	0.00754006	0.0119485	0.0121269	0.0111524	0.0110092
Cyanobacteria YS2	0.000954198	0.00741427	0.00927644	0.00455373	0	0.0056444	0.0018797	0.0102041	0.00277264	0.00754006	0.0220588	0.00373134	0.00185874	0.00550459
Fibrobacteres Fibrobacter	0.0019084	0.012975	0.00834879	0.0191257	0.00374883	0.0028222	0.0112782	0.0269017	0.0138632	0.000942507	0.0165441	0.00279851	0	0.0155963
Firmicutes [Mogibacteriaceae]	0.00381679	0.00370714	0.00371058	0.000910747	0.000937207	0.0028222	0	0.00742115	0	0.000942507	0.00643382	0.00186567	0.000929368	0.00183486
Firmicutes Butyrivibrio	0.00381679	0.00648749	0.00463822	0.00455373	0.00656045	0.0028222	0.0056391	0.00463822	0.00554529	0.00754006	0.00643382	0.00373134	0.00650558	0.00917431
Firmicutes Clostridiales	0.0276718	0.0509731	0.0231911	0.0209472	0.0309278	0.0253998	0.0112782	0.0556586	0.0277264	0.0197926	0.03125	0.056903	0.0483271	0.066055
Firmicutes Coprococcus	0.00381679	0.00185357	0.00742115	0.00455373	0.0131209	0.00470367	0.00281955	0.00185529	0.00369686	0.00377003	0.00183824	0.00279851	0.00371747	0.0110092
Firmicutes Lachnospiraceae	0.0124046	0.0250232	0.0157699	0.00819672	0.0253046	0.0206961	0.0206767	0.0241187	0.0194085	0.0160226	0.0128676	0.0242537	0.027881	0.0284404
Firmicutes RFN20	0.0104962	0.0194625	0.00463822	0.00637523	0.00374883	0.0244591	0.00845865	0.025974	0.00739372	0.00471254	0.00459559	0.0121269	0.0027881	0.000917431
Firmicutes Ruminococcaceae	0.0162214	0.0203892	0.00556586	0.0118397	0.0121837	0.0150517	0.00281955	0.0278293	0.0166359	0.00659755	0.00735294	0.0373134	0.00836431	0.0146789
Firmicutes Ruminococcus	0.00763359	0.0166821	0.00742115	0.00455373	0.0178069	0.00658514	0.00657895	0.0111317	0.0175601	0.00471254	0.0128676	0.011194	0.00743494	0.0137615
Firmicutes Selenomonas	0.000954198	0.000926784	0.000927644	0.00455373	0.00468604	0	0.00469925	0.00371058	0.00369686	0.00659755	0.000919118	0	0.000929368	0.00275229
Firmicutes Succiniclasticum	0.00667939	0.0148285	0.0157699	0.00637523	0.00468604	0.0103481	0.00281955	0.00556586	0.00184843	0.0103676	0.00643382	0.00279851	0.0185874	0.0146789
Firmicutes Veillonellaceae	0.0028626	0.00370714	0.000927644	0.00546448	0.00187441	0.00188147	0.0037594	0.00463822	0.00554529	0.00377003	0.00551471	0.00279851	0.00185874	0.00366972
Proteobacteria Succinivibrionaceae	0.000954198	0.00463392	0.00278293	0.0118397	0.00374883	0.0056444	0.00093985	0.00278293	0.00184843	0.00659755	0.000919118	0.00186567	0	0
Spirochaetes Treponema	0.0028626	0.0111214	0	0.00455373	0.00749766	0.0103481	0.00093985	0.00834879	0.00277264	0.00282752	0.00459559	0.00373134	0	0.00275229
Tenericutes Anaeroplasma	0.0028626	0.0166821	0.00371058	0.00546448	0.00468604	0.0150517	0.0056391	0.00742115	0.0101664	0.00754006	0.00827206	0.00373134	0.00557621	0.0165138
Tenericutes RF39	0.000954198	0	0.000927644	0	0.000937207	0.000940734	0	0.00278293	0.000924214	0.00188501	0.00275735	0.00466418	0.000929368	0.00275229
TM7 F16	0.00381679	0.0111214	0.00278293	0.00455373	0.000937207	0.0112888	0	0.0148423	0.00831793	0.00659755	0.0101103	0.00839552	0.00464684	0.0100917
Unassigned	0.0820611	0.104727	0.080705	0.0746812	0.0702905	0.088429	0.0573308	0.103896	0.103512	0.072573	0.09375	0.125933	0.0789963	0.0844037
