# Supplementary material for: A comparison of rumen microbial profiles in dairy cows as retrieved by 454 Roche and Ion Torrent (PGM) sequencing platforms
Source: PeerJ. 2016 Feb 4;4:e1599. doi: 10.7717/peerj.1599 (PMC4748696; doi:10.7717/peerj.1599)
Supplement: Table S3 [file peerj-04-1599-s005.xlsx]

## Sheet: Table 3- Chisqure test
	Heifer1.S2	Heifer2.S1	Heifer2.S2	Heifer4.S1	Heifer4.S2	Heifer5.S1	Heifer5.S2	Maturecow1.S1	Maturecow1.S2	Maturecow2.S1	Maturecow2.S2	Maturecow3.S2	Maturecow4.S1	Maturecow4.S2	Number of Samples Significantely different (%)
Bacteroidetes [Paraprevotellaceae]	0.7287	1	1	0.9921	0.2882	0.0145	0.4381	0.211	0.1092	0.791	0.0023	0.4654	1	0.5515	1(7.14)
Bacteroidetes Bacteroidales	0.3186	0.4291	1	0.3077	0.6393	0.3765	0.0855	0.5525	0.0055	0.0861	0.4064	0.7476	0.9371	0.247	1(7.14)
Bacteroidetes BF311	NA	0.0347	0.2321	0.9974	NA	0.2423	NA	0.0065	0.2394	0.2403	1	0.2219	0.0649	0.2556	2(14.29)
Bacteroidetes CF231	0.4871	0.7545	1	0.3642	0.7401	0.3381	0.0226	0.1936	0.3714	0.5768	0.6781	0.9528	0.5013	0.7408	1(7.14)
Bacteroidetes Prevotella	0	0.0041	0	0.0844	0	0	0	0.0013	0.1857	0.8253	0.6386	0.0016	0	0.8103	8(57.14)
Bacteroidetes Prevotellaceae	1	0.254	1	0.7302	0.4715	1	1	0.1615	0.067	0.9808	0.5337	0.0349	0.1984	0.7685	2(14.29)
Bacteroidetes RF16	0.2118	0.2945	0.0008	0.0146	0.5769	0.4409	0.215	0.9493	0.6582	0.0696	1	0.8277	0.5745	0.1344	2(14.29)
Bacteroidetes S24-7	0.2199	0.8905	1	0.6214	0.1021	0.3011	0.5891	0.7435	0.0931	0.0016	0.001	0.1526	0.9755	0	4(28.57)
Bacteroidetes YRC22	0.6068	0.8069	1	0.4654	0.5769	0.9681	0.226	0.6301	0.0702	1	0.9271	0.6877	0.1656	0.8703	1(7.14)
Cyanobacteria YS2	0.4938	0.4529	0.011	0.0013	0.4917	0.0033	0.0041	0.4743	0.4462	0.6634	0.6425	1	0.5195	0.7462	4(28.57)
Fibrobacteres Fibrobacter	0.3511	0.4416	0.982	0	0.3896	1	0.409	0.5947	0.2763	0.103	0.0182	0.7513	1	0.2805	1(7.14)
Firmicutes [Mogibacteriaceae]	0.9868	0.4554	0.982	0.9974	NA	0.0219	0.1303	0.2368	0.0119	0.4699	NA	0.1146	0.1211	1	2(14.29)
Firmicutes Butyrivibrio	1	0.5482	0.3436	0.3363	0.7853	0.0729	0.2149	1	0.6976	0.6634	0.1425	1	0.304	0.0773	1(7.14)
Firmicutes Clostridiales	0.0517	0.9986	0.1249	0.1216	0.1606	0.2635	0.0265	0.9871	1	0.3726	1	0.0031	0.0083	0.0411	4(28.57)
Firmicutes Coprococcus	0.0015	0.0293	0.6425	1	0.6367	0.6971	0.109	0.4243	1	0.6017	0.7156	0.327	0.7266	1	2(14.29)
Firmicutes Lachnospiraceae	0.1384	0.3052	0.2839	0.0076	0.3633	1	0.0337	0.3594	0.4074	0.6076	0.465	0.069	0.0257	0.4877	3(21.43)
Firmicutes RFN20	0.6532	0.0902	0.9459	0.151	0.0297	1	0.2149	0.3602	0.5127	0.6223	0.7533	0.8626	0.4167	0.0818	1(7.14)
Firmicutes Ruminococcaceae	0.6179	0.878	0.3065	0.9891	0.6367	1	0.4933	0.1983	0.0637	0.4188	0.0069	0.1152	0.5264	0.0267	2(14.29)
Firmicutes Ruminococcus	0.1129	0.1645	0.0655	0.5698	0.3647	0.0603	0.2195	0.9546	0.4663	0.8868	0.5507	0.1819	0.2101	1	0(0.00)
Firmicutes Selenomonas	0.0675	0.2288	0.0197	0.9974	0.0785	0.9936	0.9955	NA	0.1271	NA	0.1428	0.97	0.9807	0.0773	0(0.00)
Firmicutes Succiniclasticum	0.3308	0.6201	1	0.1635	1	0.977	0.0337	0.9423	0.7223	0.6017	0.4205	1	0.9755	0.8011	1(7.14)
Firmicutes Veillonellaceae	0.1982	0.3385	0.344	1	1	0.039	1	1	0.971	0.2403	0.5395	0.2219	0.3422	0.525	1(7.14)
Proteobacteria RF32	0.4938	0.1478	0.4992	1	0.467	1	NA	NA	0.2565	0.4887	0.4634	0.2752	0.5007	0.9914	1(7.14)
Proteobacteria Succinivibrionaceae	0.7912	NA	0.935	0.4822	1	0.2274	0.9899	0.3633	0.067	0.0002	0.0001	0.0002	1	0.3409	3(21.43)
Spirochaetes Treponema	0.04	0.5786	0.5852	0.4822	1	0.2127	NA	0.0528	0.9601	0.2827	0.9616	0.2219	0.0637	0.4663	1(7.14)
Tenericutes Anaeroplasma	0.9605	0.0167	1	0.6133	0.3063	0.0248	0.9881	1	1	0.0569	0.5269	0.8042	0.5345	0.525	2(14.29)
Tenericutes RF39	0.9868	0.2288	0.4596	0.9974	NA	0.2423	0.9955	0.9875	0.2394	0.0695	1	0.97	NA	NA	0(0.00)
TM7 F16	0.6401	0.4083	0.1602	1	NA	0.1128	0.9899	0.6093	0.2047	0.5754	0.6544	0.9207	0.0122	0.9713	1(7.14)
Unassigned	0.0003	0.0041	0.0004	0.0279	0.0067	0.0011	0	0.0009	0.1318	0	0.0076	0.0003	0.0044	0.1101	11(78.57)
